# Supplementary material for: Nanostructured electroless Ni deposited SnO2 for solar hydrogen production
Source: Royal Society of Chemistry journal article supplement (doi:10.1039/d4nr01194e), 2024-01-01

## Supplementary Information

### Nanostructured electroless Ni deposited SnO<sub>2</sub> for solar hydrogen production

**Priyanka N. Birla<sup>1</sup>, Sudhir Arbuj<sup>1</sup>, Ratna Chauhan<sup>2</sup>, Manish Shinde<sup>1</sup>, Sunit Rane<sup>1</sup>,  
Suresh Gosavi<sup>2</sup>, Bharat Kale<sup>1,3\*</sup>**

<sup>1</sup>Centre for Materials for Electronics Technology, Off Pashan Road, Panchwati,  
Pune-411008, India.

<sup>2</sup>Department of Environment Science, Savitribai Phule Pune University, Pune- 411007, India.

<sup>3</sup>Material science department, MITWPU, University Paud Road, Pune 38

\* Corresponding author: [bbkale1@gmail.com](mailto:bbkale1@gmail.com)

Dr. Bharat B. Kale

Former Director General

Centre for Materials for Electronics Technology (C-MET)

Panchawati, Off Pashan Road,

Pune: 411 008, India

Tel: + 91 020 25899273

Email: [bbkale1@gmail.com](mailto:bbkale1@gmail.com)

**Keywords:** Autocatalytic deposition, Ni@SnO<sub>2</sub>, Nanocomposites, Photocatalysis, H<sub>2</sub> generation

## Details of Nickel-plating bath

**Table T1.** Steps involved in surface activation and electroless Ni loading process over SnO<sub>2</sub> nanoparticles.

| Sr. No. | Solution              | Temperature (°C) | Time (min) | Water washing time (min) |
|---------|-----------------------|------------------|------------|--------------------------|
| 1       | Cleaning solution     | 60               | 10         | 1-2                      |
| 2.      | Mild etching solution | 27               | 4          | 1-2                      |
| 3.      | Acid solution         | 27               | 2          | 1-2                      |
| 4.      | Pre-activator         | 27               | 2          | 0                        |
| 5.      | Activator             | 27               | 5          | 1-2                      |
| 6.      | Post activator        | 27               | 5          | 1-2                      |
| 7.      | Electroless Ni bath   | 85               | 15         | 5                        |

## FETEM images of pristine SnO<sub>2</sub> nanopowders

**Fig. S1** FETEM images of pristine SnO<sub>2</sub> nanopowders.

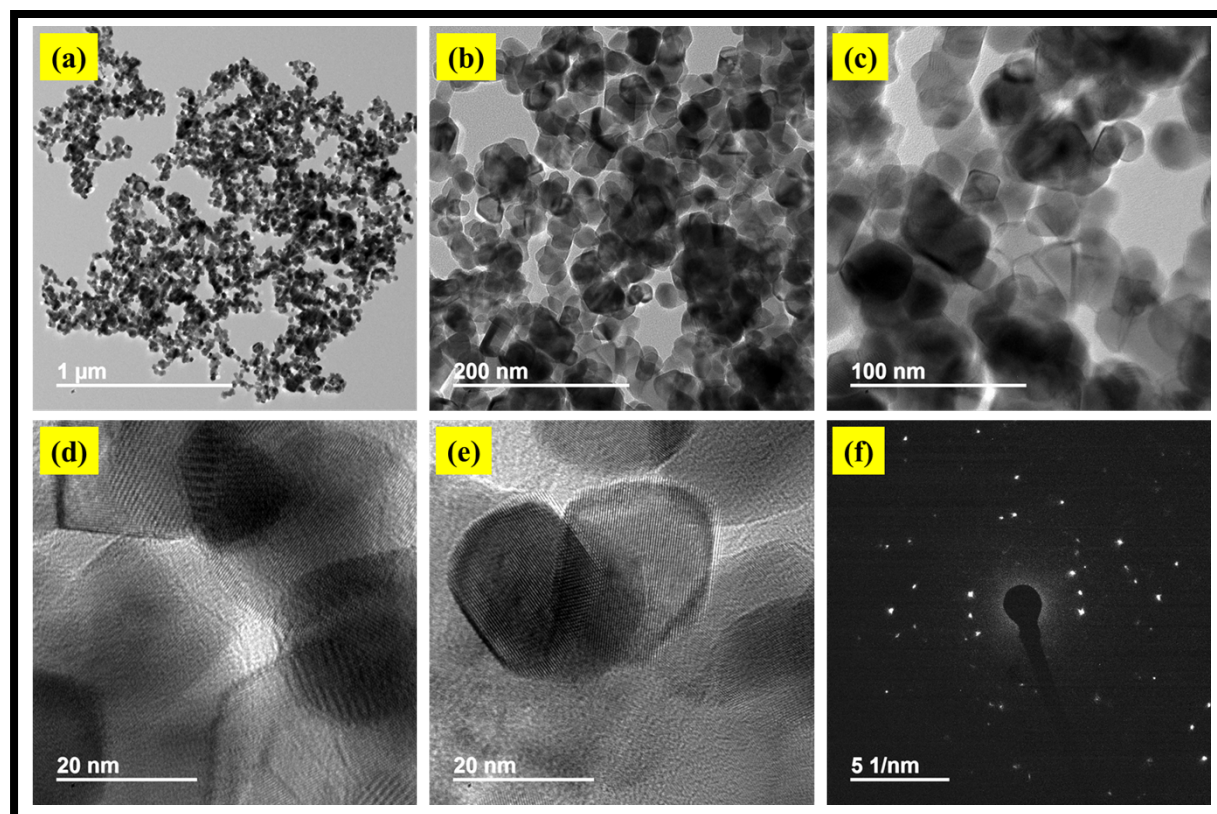

Supplement: d4nr01194e1.pdf [file d4nr01194e1.pdf]
